## NON-OPERATING ROOM EMERGENCY AIRWAY MANAGEMENT AND TRACHEAL INTUBATION: A PROSPECTIVE TRACHEAL INTUBATION STUDY

Thomas P. LaBerge MD, Michael K. Loushin MD, and Ian K. Hasinoff MD, FRCPC  
Department of Anesthesiology, University of Minnesota, Minneapolis, Minnesota

**Introduction:** Emergency airway management and tracheal intubation outside of a controlled operating room setting is often required for critically ill patients. To date there are few published reports of non-operating room emergency airway management (1). We present a prospective study which evaluated indications, medications, and complications during non-operating room emergency airway management of critically ill patients.

**Methods:** After obtaining Institutional Review Board (IRB) approval, all patients requiring emergency tracheal intubation at Fairview-University Medical Center were enrolled. After tracheal intubation of the critically ill patient, the anesthesia provider responsible for airway management completed a questionnaire which included the following topics: (1) indication for intubation; (2) intubation technique; (3) type of anesthesia; (4) medications and dosage administered; (5) difficulty of intubation; (6) number of attempts at intubation; (7) pre- and post-intubation vital signs; (8) complications; (9) need for emergency medications and dosage; (10) time, date and location.

**Results:** From July 1 to December 31, 2001 the anesthesia care team performed a total of 144 non-operating room intubations, of which 141/144 (98%) were performed by the CA-2 residents and 3/144 (2%) were performed by staff anesthesiologists or nurse anesthetists. Sedative/hypnotics and muscle relaxants were administered 124/144 (86%) and 44/144 (31%), respectively.

| Table 1 Indication for Tracheal Intubation |              | Table 2 Complications of Tracheal Intubation |              |
|--------------------------------------------|--------------|----------------------------------------------|--------------|
| Respiratory failure                        | 81/144 (56%) | Hypertension                                 | 27/144 (19%) |
| Decreased consciousness                    | 33/144 (23%) | Hypotension                                  | 21/144 (15%) |
| Cardiac arrest                             | 14/144 (10%) | Tachycardia                                  | 8/144 (3%)   |
| Respiratory arrest                         | 12/144 (8%)  | Emesis                                       | 5/144 (2%)   |
| Increased ICP                              | 3/144 (2%)   | Bradycardia                                  | 2/144 (1%)   |

| Table 3 Perceived Difficulty of Intubation |              | Table 4 Number of Attempts at Intubation |               |
|--------------------------------------------|--------------|------------------------------------------|---------------|
| Grade 1                                    | 86/144 (60%) | 1                                        | 123/144 (85%) |
| Grade 2                                    | 33/144 (23%) | 2                                        | 16/144 (11%)  |
| Grade 3                                    | 15/144 (10%) | 3                                        | 4/144 (3%)    |
| Grade 4                                    | 10/144 (7%)  | 4 or more                                | 1/144 (1%)    |

**Conclusion:** Non-operating room emergency airway management and tracheal intubation is often required for critically ill patients. Although CA-2 residents perform the majority of emergency tracheal intubations, we have not had a major complication such as failure to intubate a critically ill patient. Our very low complication rate without serious sequelae may be due to the judicious use of neuromuscular blocking agents.

### References:

1. Pankaj et al., Non-Operating Room Emergency Airway Management and Endotracheal Intubation Practices: A Survey of Anesthesiology Program Directors. *Anesthesia and Analgesia* 1997;85:62-8.
